# Supplementary material for: GC-IMS-Based Volatile Characteristic Analysis of Hypsizygus marmoreus Dried by Different Methods
Source: MDPI journal article supplement (doi:10.3390/foods13091322), 2024-04-25
Supplement: s1 [file s1]

Table S1 Gas chromatography program conditions.

| Time (min) | Drift gas (mL/min) | Carrier gas (mL/min) | Recording |
|------------|--------------------|----------------------|-----------|
| 0          | 150                | 2                    | rec       |
| 2          | 150                | 2                    | -         |
| 10         | 150                | 10                   | -         |
| 20         | 150                | 100                  | -         |
| 40         | 150                | 100                  | stop      |

Table S2 GC-IMS analysis conditions.

| <b>GC-IMS</b>                      |                                 |
|------------------------------------|---------------------------------|
| Analysis time                      | 40 min                          |
| chromatographic column             | MXT-WAX (30 m × 0.53 mm × 1 μm) |
| Column temperature                 | 60°C                            |
| Carrier gas/Drift gas              | N <sub>2</sub>                  |
| IMS temperature                    | 45°C                            |
| <b>Automated headspace sampler</b> |                                 |
| Injection volume                   | 500 μL                          |
| Incubation time                    | 20 min                          |
| Incubation temperature             | 60°C                            |
| Injection needle temperature       | 85°C                            |
| Incubation speed                   | 500 rpm                         |

Table S3 Total peak intensity of volatile compounds

| Compound                     | HAD                            | HPD                            | HFD                           | UFD                           |
|------------------------------|--------------------------------|--------------------------------|-------------------------------|-------------------------------|
| Ester                        | 57749.18±1645.53 <sup>a</sup>  | 58616.34±1823.31 <sup>a</sup>  | 37526.87±1142.76 <sup>c</sup> | 42821.6±487.72 <sup>b</sup>   |
| Aldehyde                     | 43672.23±1224.98 <sup>b</sup>  | 45967.2±562.19 <sup>a</sup>    | 42330.17±255.35 <sup>b</sup>  | 34232.11±266.53 <sup>c</sup>  |
| Alcohol                      | 69547.58±1584.08 <sup>a</sup>  | 59759.48±398.29 <sup>d</sup>   | 64949.65±688.18 <sup>c</sup>  | 67253.74±339.13 <sup>b</sup>  |
| Ketone                       | 31337.91±1695.68 <sup>a</sup>  | 20903.29±81.83 <sup>b</sup>    | 21141.37±683.66 <sup>b</sup>  | 19118.7±406.56 <sup>b</sup>   |
| Heterocyclic compound        | 8454.45±313.69 <sup>a</sup>    | 5443.76±82.71 <sup>b</sup>     | 5697.97±228.32 <sup>b</sup>   | 3987.23±37.23 <sup>c</sup>    |
| Carboxylic acid              | 169684.85±3386.03 <sup>a</sup> | 112958.72±5135.23 <sup>b</sup> | 107790.6±3056.05 <sup>b</sup> | 108074.25±964.34 <sup>b</sup> |
| Terpene                      | 4852.6±122.64 <sup>a</sup>     | 4249.2±65.77 <sup>b</sup>      | 3362.57±70.83 <sup>d</sup>    | 3680.95±89.49 <sup>c</sup>    |
| Sulfur-containing compound   | 1326.96±88.41 <sup>d</sup>     | 1845.21±15.2 <sup>c</sup>      | 3026.78±64.68 <sup>a</sup>    | 2100.46±19.72 <sup>b</sup>    |
| Nitrogen-containing compound | 16689.58±1745.14 <sup>c</sup>  | 22996.53±371.18 <sup>b</sup>   | 27988.61±2256.53 <sup>a</sup> | 30365±1623.45 <sup>a</sup>    |
| Aromatic hydrocarbon         | 760.66±23.35 <sup>b</sup>      | 719.13±15.16 <sup>b</sup>      | 850.45±52.77 <sup>a</sup>     | 419.44±14.21 <sup>c</sup>     |
| Total                        | 404076±1537.27 <sup>a</sup>    | 333458.86±3149.11 <sup>b</sup> | 314665.04±5207.8 <sup>c</sup> | 312053.48±366.87 <sup>c</sup> |

The different letters within the same row indicate significant differences ( $p < 0.05$ ).

Table S4 Percentage of volatile compounds

| Compound                        | HAD<br>(%) | HPD<br>(%) | HFD<br>(%) | UFD<br>(%) |
|---------------------------------|------------|------------|------------|------------|
| Ester                           | 14.29±0.36 | 17.58±0.7  | 11.93±0.42 | 13.72±0.14 |
| Aldehyde                        | 10.81±0.26 | 13.78±0.05 | 13.46±0.17 | 10.97±0.1  |
| Alcohol                         | 17.21±0.33 | 17.92±0.29 | 20.64±0.23 | 21.55±0.09 |
| Ketone                          | 7.75±0.39  | 6.27±0.08  | 6.72±0.29  | 6.13±0.13  |
| Heterocyclic<br>compound        | 2.09±0.07  | 1.63±0.01  | 1.81±0.04  | 1.28±0.01  |
| Carboxylic acid                 | 42.00±0.98 | 33.86±1.22 | 34.25±0.47 | 34.63±0.27 |
| Terpene                         | 1.20±0.03  | 1.27±0.03  | 1.07±0.02  | 1.18±0.03  |
| Sulfur-containing<br>compound   | 0.33±0.02  | 0.55±0.01  | 0.96±0.03  | 0.67±0.01  |
| Nitrogen-containing<br>compound | 4.13±0.45  | 6.9±0.17   | 8.89±0.61  | 9.73±0.53  |
| Aromatic<br>hydrocarbon         | 0.19±0.01  | 0.22±0.01  | 0.27±0.02  | 0.13±0.01  |
| Total                           | 100.00     | 100.00     | 100.00     | 100.00     |
